# Supplementary material for: Structural basis of membrane recognition of Toxoplasma gondii vacuole by Irgb6
Source: Life Sci Alliance. 2021 Nov 9;5(1):e202101149. doi: 10.26508/lsa.202101149 (PMC8605323; doi:10.26508/lsa.202101149)
Supplement: Supplementary file 1 [file LSA-2021-01149_TableS1.xlsx]

## Sheet: Sheet1
Data Collection and Refinement Statistics
	Nucleotide-free Irgb6	GTP-bound Irgb6
PDB ID	7VES	7VEX
Data collection
Space group	P212121	P212121
Unit cell parameter
a,b,c (Å)	41.16, 63.22, 155.83	69.62, 75.74, 80.62
α, β, γ (°)	90, 90, 90	90, 90, 90
Resolution range (Å)	40.13–1.89 (2.00–1.89)	43.29–1.51 (1.60–1.51)
No. of reflections
observed	282350 (33001)	908557 (148266)
unique	61062 (8033)	129901 (20925)
possible	63292 (10178)	129985 (20987)
Completeness (%)	96.5 (78.9)	99.9 (99.7)
R-merge(%)	13.1 (163.1)	16.4 (170.1)
R-meas (%)	14.7 (186.4)	17.7 (183.6)
<I/σ(I)>	9.63 (0.87)	15.07 (1.12)
CC1/2	99.7 (42.2)	99.9 (52.4)
Multiplicity	4.62 (4.11)	6.99 (7.09)
Refinement
Resolution range (Å)	40.13–2.00 (2.03-2.00)	43.29–1.51 (1.55–1.51)
Reflections used in refinement	52897 (2217)	65855 (4817)
Reflections used for R-free	3251(144)	1997 (142)
Completeness (%)	99.61 (100.00)	99.94 (99.48)
R-work/R-free	0.2075 (0.3116) / 0.2468 (0.3562)	0.1469 (0.477) / 0.1969 (0.458)
Number of non-hydrogen atoms	3133	3655
macromolecules	2990	3320
solvent	143	303
ligands	―	32
RMS (bounds)	0.009	0.017
RMS (angles)	0.82	1.98
Ramachandran plot (%)
favored	97.45	96.57
allowed	2.55	3.19
outliers	0.00	0.25
Rotamer outliers(%)	0.00	1.65
Clashscore	2.69	5.26
Average B-factor (Å2)	42.88	33.23
Statistics for the highest-resolution shell are shown in parentheses.
